# Supplementary material for: Epidemiologic and Genomic Analysis of the Severe Acute Respiratory Syndrome Coronavirus 2 Epidemic in the Nebraska Region of the United States, March 2020–2021
Source: Front Microbiol. 2022 May 18;13:878342. doi: 10.3389/fmicb.2022.878342 (PMC9158493; doi:10.3389/fmicb.2022.878342)
Supplement: Supplementary file 1 [file Table_1.XLSX]

## Sheet: Sheet1
Sequence Name	Accession #
hCoV-19/USA/NE-CUMC_20188A022/2020	EPI_ISL_9158038
hCoV-19/USA/NE-CUMC_20107001/2020	EPI_ISL_9157970
hCoV-19/USA/NE-CUMC_20107004/2020	EPI_ISL_9157972
hCoV-19/USA/NE-CUMC_20107006/2020	EPI_ISL_9157974
hCoV-19/USA/NE-CUMC_20107007/2020	EPI_ISL_9157975
hCoV-19/USA/NE-CUMC_20107010/2020	EPI_ISL_9157976
hCoV-19/USA/NE-CUMC_20107011/2020	EPI_ISL_9157977
hCoV-19/USA/NE-CUMC_20107012/2020	EPI_ISL_9157978
hCoV-19/USA/NE-CUMC_20107013/2020	EPI_ISL_9157979
hCoV-19/USA/NE-CUMC_20107014/2020	EPI_ISL_9157980
hCoV-19/USA/NE-CUMC_20107019/2020	EPI_ISL_9157982
hCoV-19/USA/NE-CUMC_20122002/2020	EPI_ISL_9157994
hCoV-19/USA/NE-CUMC_20122003/2020	EPI_ISL_9157995
hCoV-19/USA/NE-CUMC_20122005/2020	EPI_ISL_9157996
hCoV-19/USA/NE-CUMC_20122008/2020	EPI_ISL_9157997
hCoV-19/USA/NE-CUMC_20122009/2020	EPI_ISL_9157998
hCoV-19/USA/NE-CUMC_20122015/2020	EPI_ISL_9157999
hCoV-19/USA/NE-CUMC_20122017/2020	EPI_ISL_9158000
hCoV-19/USA/NE-CUMC_20122020/2020	EPI_ISL_9158001
hCoV-19/USA/NE-CUMC_20122024/2020	EPI_ISL_9158002
hCoV-19/USA/NE-CUMC_20163003/2020	EPI_ISL_9158012
hCoV-19/USA/NE-CUMC_20163006/2020	EPI_ISL_9158013
hCoV-19/USA/NE-CUMC_20164002/2020	EPI_ISL_9158015
hCoV-19/USA/NE-CUMC_20164005/2020	EPI_ISL_9158016
hCoV-19/USA/NE-CUMC_20164006/2020	EPI_ISL_9158017
hCoV-19/USA/NE-CUMC_20177002/2020	EPI_ISL_9158018
hCoV-19/USA/NE-CUMC_20177003/2020	EPI_ISL_9158019
hCoV-19/USA/NE-CUMC_20177005/2020	EPI_ISL_9158020
hCoV-19/USA/NE-CUMC_20177006/2020	EPI_ISL_9158021
hCoV-19/USA/NE-CUMC_20178002/2020	EPI_ISL_9158022
hCoV-19/USA/NE-CUMC_20178003/2020	EPI_ISL_9158023
hCoV-19/USA/NE-CUMC_20178009/2020	EPI_ISL_9158024
hCoV-19/USA/NE-CUMC_20181004/2020	EPI_ISL_9158025
hCoV-19/USA/NE-CUMC_20181007/2020	EPI_ISL_9158026
hCoV-19/USA/NE-CUMC_20181009/2020	EPI_ISL_9158027
hCoV-19/USA/NE-CUMC_20181015/2020	EPI_ISL_9158028
hCoV-19/USA/NE-CUMC_20182005/2020	EPI_ISL_9158029
hCoV-19/USA/NE-CUMC_20182006/2020	EPI_ISL_9158031
hCoV-19/USA/NE-CUMC_20182008/2020	EPI_ISL_9158033
hCoV-19/USA/NE-CUMC_20182011/2020	EPI_ISL_9158034
hCoV-19/USA/NE-CUMC_20185009/2020	EPI_ISL_9158036
hCoV-19/USA/NE-CUMC_20185010/2020	EPI_ISL_9158037
hCoV-19/USA/NE-CUMC_20189002/2020	EPI_ISL_9158039
hCoV-19/USA/NE-CUMC_20189003/2020	EPI_ISL_9158040
hCoV-19/USA/NE-CUMC_20189006/2020	EPI_ISL_9158041
hCoV-19/USA/NE-CUMC_20189007/2020	EPI_ISL_9158042
hCoV-19/USA/NE-CUMC_20189008/2020	EPI_ISL_9158043
hCoV-19/USA/NE-CUMC_20190001/2020	EPI_ISL_9158046
hCoV-19/USA/NE-CUMC_20190006/2020	EPI_ISL_9158047
hCoV-19/USA/NE-CUMC_20223066/2020	EPI_ISL_9158052
hCoV-19/USA/NE-CUMC_20223087/2020	EPI_ISL_9158053
hCoV-19/USA/NE-CUMC_20223138/2020	EPI_ISL_9158056
hCoV-19/USA/NE-CUMC_20230010/2020	EPI_ISL_9158058
hCoV-19/USA/NE-CUMC_20230019/2020	EPI_ISL_9158060
hCoV-19/USA/NE-CUMC_20230027/2020	EPI_ISL_9158061
hCoV-19/USA/NE-CUMC_20230040/2020	EPI_ISL_9158062
hCoV-19/USA/NE-CUMC_20230042/2020	EPI_ISL_9158063
hCoV-19/USA/NE-CUMC_20230115/2020	EPI_ISL_9158066
hCoV-19/USA/NE-CUMC_20237003/2020	EPI_ISL_9158067
hCoV-19/USA/NE-CUMC_20237006/2020	EPI_ISL_9158068
hCoV-19/USA/NE-CUMC_20237036/2020	EPI_ISL_9158069
hCoV-19/USA/NE-CUMC_20237054/2020	EPI_ISL_9158070
hCoV-19/USA/NE-CUMC_20237061/2020	EPI_ISL_9158071
hCoV-19/USA/NE-CUMC_20237096/2020	EPI_ISL_9158072
hCoV-19/USA/NE-CUMC_20237125/2020	EPI_ISL_9158074
hCoV-19/USA/NE-CUMC_20244024/2020	EPI_ISL_9158076
hCoV-19/USA/NE-CUMC_20244025/2020	EPI_ISL_9158077
hCoV-19/USA/NE-CUMC_20244087/2020	EPI_ISL_9158082
hCoV-19/USA/NE-CUMC_20244088/2020	EPI_ISL_9158083
hCoV-19/USA/NE-CUMC_20244089/2020	EPI_ISL_9158084
hCoV-19/USA/NE-CUMC_20252034/2020	EPI_ISL_9158087
hCoV-19/USA/NE-CUMC_20252076/2020	EPI_ISL_9158090
hCoV-19/USA/NE-CUMC_20252133/2020	EPI_ISL_9158093
hCoV-19/USA/NE-CUMC_20258002/2020	EPI_ISL_9158096
hCoV-19/USA/NE-CUMC_20258035/2020	EPI_ISL_9158098
hCoV-19/USA/NE-CUMC_20258107/2020	EPI_ISL_9158100
hCoV-19/USA/NE-CUMC_20265064/2020	EPI_ISL_9158106
hCoV-19/USA/NE-CUMC_20189A003/2020	EPI_ISL_9158044
hCoV-19/USA/NE-CUMC_20189A008/2020	EPI_ISL_9158045
hCoV-19/USA/NE-CUMC_20084001/2020	EPI_ISL_9157892
hCoV-19/USA/NE-CUMC_20084002/2020	EPI_ISL_9157893
hCoV-19/USA/NE-CUMC_20085001/2020	EPI_ISL_9157894
hCoV-19/USA/NE-CUMC_20086002/2020	EPI_ISL_9157895
hCoV-19/USA/NE-CUMC_20087003/2020	EPI_ISL_9157896
hCoV-19/USA/NE-CUMC_20088002/2020	EPI_ISL_9157897
hCoV-19/USA/NE-CUMC_20088003/2020	EPI_ISL_9157898
hCoV-19/USA/NE-CUMC_20089001/2020	EPI_ISL_9157899
hCoV-19/USA/NE-CUMC_20089003/2020	EPI_ISL_9157900
hCoV-19/USA/NE-CUMC_20089004/2020	EPI_ISL_9157901
hCoV-19/USA/NE-CUMC_20090001/2020	EPI_ISL_9157902
hCoV-19/USA/NE-CUMC_20090003/2020	EPI_ISL_9157903
hCoV-19/USA/NE-CUMC_20090005/2020	EPI_ISL_9157904
hCoV-19/USA/NE-CUMC_20090006/2020	EPI_ISL_9157905
hCoV-19/USA/NE-CUMC_20090008/2020	EPI_ISL_9157906
hCoV-19/USA/NE-CUMC_20090009/2020	EPI_ISL_9157907
hCoV-19/USA/NE-CUMC_20090010/2020	EPI_ISL_9157908
hCoV-19/USA/NE-CUMC_20090014/2020	EPI_ISL_9157909
hCoV-19/USA/NE-CUMC_20091001/2020	EPI_ISL_9157910
hCoV-19/USA/NE-CUMC_20091002/2020	EPI_ISL_9157911
hCoV-19/USA/NE-CUMC_20091004/2020	EPI_ISL_9157912
hCoV-19/USA/NE-CUMC_20091005/2020	EPI_ISL_9157913
hCoV-19/USA/NE-CUMC_20091006/2020	EPI_ISL_9157914
hCoV-19/USA/NE-CUMC_20091007/2020	EPI_ISL_9157915
hCoV-19/USA/NE-CUMC_20091008/2020	EPI_ISL_9157916
hCoV-19/USA/NE-CUMC_20091010/2020	EPI_ISL_9157917
hCoV-19/USA/NE-CUMC_20093005/2020	EPI_ISL_9157918
hCoV-19/USA/NE-CUMC_20097014/2020	EPI_ISL_9157919
hCoV-19/USA/NE-CUMC_20098002/2020	EPI_ISL_9157920
hCoV-19/USA/NE-CUMC_20099002/2020	EPI_ISL_9157921
hCoV-19/USA/NE-CUMC_20099008/2020	EPI_ISL_9157922
hCoV-19/USA/NE-CUMC_20099009/2020	EPI_ISL_9157923
hCoV-19/USA/NE-CUMC_20100002/2020	EPI_ISL_9157924
hCoV-19/USA/NE-CUMC_20100022/2020	EPI_ISL_9157925
hCoV-19/USA/NE-CUMC_20101004/2020	EPI_ISL_9157926
hCoV-19/USA/NE-CUMC_20101006/2020	EPI_ISL_9157927
hCoV-19/USA/NE-CUMC_20101012/2020	EPI_ISL_9157928
hCoV-19/USA/NE-CUMC_20101013/2020	EPI_ISL_9157929
hCoV-19/USA/NE-CUMC_20101019/2020	EPI_ISL_9157930
hCoV-19/USA/NE-CUMC_20101021/2020	EPI_ISL_9157931
hCoV-19/USA/NE-CUMC_20101023/2020	EPI_ISL_9157932
hCoV-19/USA/NE-CUMC_20101025/2020	EPI_ISL_9157933
hCoV-19/USA/NE-CUMC_20101030/2020	EPI_ISL_9157934
hCoV-19/USA/NE-CUMC_20101032/2020	EPI_ISL_9157935
hCoV-19/USA/NE-CUMC_20101038/2020	EPI_ISL_9157936
hCoV-19/USA/NE-CUMC_20101039/2020	EPI_ISL_9157937
hCoV-19/USA/NE-CUMC_20101040/2020	EPI_ISL_9157938
hCoV-19/USA/NE-CUMC_20101041/2020	EPI_ISL_9157939
hCoV-19/USA/NE-CUMC_20101047/2020	EPI_ISL_9157940
hCoV-19/USA/NE-CUMC_20102001/2020	EPI_ISL_9157941
hCoV-19/USA/NE-CUMC_20102004/2020	EPI_ISL_9157942
hCoV-19/USA/NE-CUMC_20102007/2020	EPI_ISL_9157943
hCoV-19/USA/NE-CUMC_20102011/2020	EPI_ISL_9157944
hCoV-19/USA/NE-CUMC_20102012/2020	EPI_ISL_9157945
hCoV-19/USA/NE-CUMC_20104006/2020	EPI_ISL_9157946
hCoV-19/USA/NE-CUMC_20104018/2020	EPI_ISL_9157947
hCoV-19/USA/NE-CUMC_20104029/2020	EPI_ISL_9157948
hCoV-19/USA/NE-CUMC_20104031/2020	EPI_ISL_9157949
hCoV-19/USA/NE-CUMC_20105002/2020	EPI_ISL_9157950
hCoV-19/USA/NE-CUMC_20105007/2020	EPI_ISL_9157951
hCoV-19/USA/NE-CUMC_20105012/2020	EPI_ISL_9157952
hCoV-19/USA/NE-CUMC_20105023/2020	EPI_ISL_9157953
hCoV-19/USA/NE-CUMC_20105036/2020	EPI_ISL_9157954
hCoV-19/USA/NE-CUMC_20106003/2020	EPI_ISL_9157955
hCoV-19/USA/NE-CUMC_20106005/2020	EPI_ISL_9157956
hCoV-19/USA/NE-CUMC_20106007/2020	EPI_ISL_9157957
hCoV-19/USA/NE-CUMC_20106011/2020	EPI_ISL_9157958
hCoV-19/USA/NE-CUMC_20106016/2020	EPI_ISL_9157959
hCoV-19/USA/NE-CUMC_20106018/2020	EPI_ISL_9157960
hCoV-19/USA/NE-CUMC_20106022/2020	EPI_ISL_9157961
hCoV-19/USA/NE-CUMC_20106025/2020	EPI_ISL_9157962
hCoV-19/USA/NE-CUMC_20106032/2020	EPI_ISL_9157963
hCoV-19/USA/NE-CUMC_20106033/2020	EPI_ISL_9157964
hCoV-19/USA/NE-CUMC_20106034/2020	EPI_ISL_9157965
hCoV-19/USA/NE-CUMC_20106035/2020	EPI_ISL_9157966
hCoV-19/USA/NE-CUMC_20106036/2020	EPI_ISL_9157967
hCoV-19/USA/NE-CUMC_20106038/2020	EPI_ISL_9157968
hCoV-19/USA/NE-CUMC_20106040/2020	EPI_ISL_9157969
hCoV-19/USA/NE-CUMC_20107002/2020	EPI_ISL_9157970
hCoV-19/USA/NE-CUMC_20107015/2020	EPI_ISL_9157981
hCoV-19/USA/NE-CUMC_20118001/2020	EPI_ISL_9157983
hCoV-19/USA/NE-CUMC_20118003/2020	EPI_ISL_9157984
hCoV-19/USA/NE-CUMC_20118006/2020	EPI_ISL_9157986
hCoV-19/USA/NE-CUMC_20118008/2020	EPI_ISL_9157987
hCoV-19/USA/NE-CUMC_20118010/2020	EPI_ISL_9157988
hCoV-19/USA/NE-CUMC_20118014/2020	EPI_ISL_9157989
hCoV-19/USA/NE-CUMC_20118015/2020	EPI_ISL_9157990
hCoV-19/USA/NE-CUMC_20118019/2020	EPI_ISL_9157991
hCoV-19/USA/NE-CUMC_20118021/2020	EPI_ISL_9157992
hCoV-19/USA/NE-CUMC_20118022/2020	EPI_ISL_9157993
hCoV-19/USA/NE-CUMC_20129002/2020	EPI_ISL_9158003
hCoV-19/USA/NE-CUMC_20130001/2020	EPI_ISL_9158004
hCoV-19/USA/NE-CUMC_20131001/2020	EPI_ISL_9158005
hCoV-19/USA/NE-CUMC_20143001/2020	EPI_ISL_9158007
hCoV-19/USA/NE-CUMC_20143002/2020	EPI_ISL_9158008
hCoV-19/USA/NE-CUMC_20145002/2020	EPI_ISL_9158009
hCoV-19/USA/NE-CUMC_20145003/2020	EPI_ISL_9158010
hCoV-19/USA/NE-CUMC_20151002/2020	EPI_ISL_9158011
hCoV-19/USA/NE-CUMC_20163014/2020	EPI_ISL_9158014
hCoV-19/USA/NE-CUMC_20182007/2020	EPI_ISL_9158032
hCoV-19/USA/NE-CUMC_20184002/2020	EPI_ISL_9158035
hCoV-19/USA/NE-CUMC_20195003/2020	EPI_ISL_9158048
hCoV-19/USA/NE-CUMC_20195016/2020	EPI_ISL_9158049
hCoV-19/USA/NE-CUMC_20196011/2020	EPI_ISL_9158050
hCoV-19/USA/NE-CUMC_20198025/2020	EPI_ISL_9158051
hCoV-19/USA/NE-CUMC_20223106/2020	EPI_ISL_9158054
hCoV-19/USA/NE-CUMC_20223137/2020	EPI_ISL_9158055
hCoV-19/USA/NE-CUMC_20223142/2020	EPI_ISL_9158057
hCoV-19/USA/NE-CUMC_20230015/2020	EPI_ISL_9158059
hCoV-19/USA/NE-CUMC_20230057/2020	EPI_ISL_9158064
hCoV-19/USA/NE-CUMC_20230099/2020	EPI_ISL_9158065
hCoV-19/USA/NE-CUMC_20230109/2020	EPI_ISL_9158066
hCoV-19/USA/NE-CUMC_20244017/2020	EPI_ISL_9158075
hCoV-19/USA/NE-CUMC_20244030/2020	EPI_ISL_9158078
hCoV-19/USA/NE-CUMC_20244031/2020	EPI_ISL_9158079
hCoV-19/USA/NE-CUMC_20244070/2020	EPI_ISL_9158081
hCoV-19/USA/NE-CUMC_20244105/2020	EPI_ISL_9158085
hCoV-19/USA/NE-CUMC_20252019/2020	EPI_ISL_9158086
hCoV-19/USA/NE-CUMC_20252039/2020	EPI_ISL_9158088
hCoV-19/USA/NE-CUMC_20252063/2020	EPI_ISL_9158089
hCoV-19/USA/NE-CUMC_20252079/2020	EPI_ISL_9158091
hCoV-19/USA/NE-CUMC_20252132/2020	EPI_ISL_9158092
hCoV-19/USA/NE-CUMC_20252135/2020	EPI_ISL_9158094
hCoV-19/USA/NE-CUMC_20252170/2020	EPI_ISL_9158095
hCoV-19/USA/NE-CUMC_20258033/2020	EPI_ISL_9158097
hCoV-19/USA/NE-CUMC_20258039/2020	EPI_ISL_9158099
hCoV-19/USA/NE-CUMC_20258124/2020	EPI_ISL_9158101
hCoV-19/USA/NE-CUMC_20258163/2020	EPI_ISL_9158102
hCoV-19/USA/NE-CUMC_20265004/2020	EPI_ISL_9158103
hCoV-19/USA/NE-CUMC_20265047/2020	EPI_ISL_9158104
hCoV-19/USA/NE-CUMC_20265052/2020	EPI_ISL_9158105
hCoV-19/USA/NE-CUMC_20265072/2020	EPI_ISL_9158107
hCoV-19/USA/NE-CUMC_20265075/2020	EPI_ISL_9158108
hCoV-19/USA/NE-CUMC_20265088/2020	EPI_ISL_9158109
hCoV-19/USA/NE-CUMC_20265097/2020	EPI_ISL_9158110
hCoV-19/USA/NE-CUMC_20265123/2020	EPI_ISL_9158111
hCoV-19/USA/NE-CUMC_20265136/2020	EPI_ISL_9158112
hCoV-19/USA/NE-CUMC_20272005/2020	EPI_ISL_9158113
hCoV-19/USA/NE-CUMC_20272009/2020	EPI_ISL_9158114
hCoV-19/USA/NE-CUMC_20272013/2020	EPI_ISL_9158115
hCoV-19/USA/NE-CUMC_20272028/2020	EPI_ISL_9158116
hCoV-19/USA/NE-CUMC_20272031/2020	EPI_ISL_9158117
hCoV-19/USA/NE-CUMC_20272047/2020	EPI_ISL_9158118
hCoV-19/USA/NE-CUMC_20272082/2020	EPI_ISL_9158119
hCoV-19/USA/NE-CUMC_20272118/2020	EPI_ISL_9158120
hCoV-19/USA/NE-CUMC_20272128/2020	EPI_ISL_9158121
hCoV-19/USA/NE-CUMC_20279011/2020	EPI_ISL_9158122
hCoV-19/USA/NE-CUMC_20279016/2020	EPI_ISL_9158123
hCoV-19/USA/NE-CUMC_20279048/2020	EPI_ISL_9158124
hCoV-19/USA/NE-CUMC_20279092/2020	EPI_ISL_9158125
hCoV-19/USA/NE-CUMC_20279139/2020	EPI_ISL_9158126
hCoV-19/USA/NE-CUMC_20279187/2020	EPI_ISL_9158127
hCoV-19/USA/NE-CUMC_20286021/2020	EPI_ISL_9158128
hCoV-19/USA/NE-CUMC_20286058/2020	EPI_ISL_9158129
hCoV-19/USA/NE-CUMC_20286097/2020	EPI_ISL_9158130
hCoV-19/USA/NE-CUMC_20286108/2020	EPI_ISL_9158131
hCoV-19/USA/NE-CUMC_20286117/2020	EPI_ISL_9158132
hCoV-19/USA/NE-CUMC_20286149/2020	EPI_ISL_9158133
hCoV-19/USA/NE-CUMC_20293007/2020	EPI_ISL_9158134
hCoV-19/USA/NE-CUMC_20293015/2020	EPI_ISL_9158135
hCoV-19/USA/NE-CUMC_20293091/2020	EPI_ISL_9158136
hCoV-19/USA/NE-CUMC_20293101/2020	EPI_ISL_9158140
hCoV-19/USA/NE-CUMC_20293125/2020	EPI_ISL_9158138
hCoV-19/USA/NE-CUMC_20293131/2020	EPI_ISL_9158142
hCoV-19/USA/NE-CUMC_20293132/2020	EPI_ISL_9158143
hCoV-19/USA/NE-CUMC_20293137/2020	EPI_ISL_9158144
hCoV-19/USA/NE-CUMC_20293147/2020	EPI_ISL_9158145
hCoV-19/USA/NE-CUMC_20300006/2020	EPI_ISL_9158146
hCoV-19/USA/NE-CUMC_20300018/2020	EPI_ISL_9158147
hCoV-19/USA/NE-CUMC_20300027/2020	EPI_ISL_9158148
hCoV-19/USA/NE-CUMC_20300029/2020	EPI_ISL_9158149
hCoV-19/USA/NE-CUMC_20300037/2020	EPI_ISL_9158150
hCoV-19/USA/NE-CUMC_20300039/2020	EPI_ISL_9158151
hCoV-19/USA/NE-CUMC_20300059/2020	EPI_ISL_9158152
hCoV-19/USA/NE-CUMC_20300061/2020	EPI_ISL_9158153
hCoV-19/USA/NE-CUMC_20300076/2020	EPI_ISL_9158154
hCoV-19/USA/NE-CUMC_20300079/2020	EPI_ISL_9158155
hCoV-19/USA/NE-CUMC_20300108/2020	EPI_ISL_9158156
hCoV-19/USA/NE-CUMC_20300117/2020	EPI_ISL_9158157
hCoV-19/USA/NE-CUMC_20300123/2020	EPI_ISL_9158158
hCoV-19/USA/NE-CUMC_20300124/2020	EPI_ISL_9158159
hCoV-19/USA/NE-CUMC_20300128/2020	EPI_ISL_9158160
hCoV-19/USA/NE-CUMC_20300131/2020	EPI_ISL_9158161
hCoV-19/USA/NE-CUMC_20300194/2020	EPI_ISL_9158162
hCoV-19/USA/NE-CUMC_20300201/2020	EPI_ISL_9158163
hCoV-19/USA/NE-CUMC_20300231/2020	EPI_ISL_9158164
hCoV-19/USA/NE-CUMC_20300232/2020	EPI_ISL_9158165
hCoV-19/USA/NE-CUMC_20307028/2020	EPI_ISL_9158166
hCoV-19/USA/NE-CUMC_20307045/2020	EPI_ISL_9158167
hCoV-19/USA/NE-CUMC_20307095/2020	EPI_ISL_9158168
hCoV-19/USA/NE-CUMC_20307109/2020	EPI_ISL_9158169
hCoV-19/USA/NE-CUMC_20307123/2020	EPI_ISL_9158170
hCoV-19/USA/NE-CUMC_20307124/2020	EPI_ISL_9158171
hCoV-19/USA/NE-CUMC_20307125/2020	EPI_ISL_9158172
hCoV-19/USA/NE-CUMC_20307128/2020	EPI_ISL_9158173
hCoV-19/USA/NE-CUMC_20307153/2020	EPI_ISL_9158174
hCoV-19/USA/NE-CUMC_20307219/2020	EPI_ISL_9158175
hCoV-19/USA/NE-CUMC_20307245/2020	EPI_ISL_9158176
hCoV-19/USA/NE-CUMC_20307255/2020	EPI_ISL_9158177
hCoV-19/USA/NE-CUMC_20307259/2020	EPI_ISL_9158178
hCoV-19/USA/NE-CUMC_20307296/2020	EPI_ISL_9158179
hCoV-19/USA/NE-CUMC_20307312/2020	EPI_ISL_9158180
hCoV-19/USA/NE-CUMC_20307325/2020	EPI_ISL_9158181
hCoV-19/USA/NE-CUMC_20314031/2020	EPI_ISL_9158182
hCoV-19/USA/NE-CUMC_20314050/2020	EPI_ISL_9158183
hCoV-19/USA/NE-CUMC_20314064/2020	EPI_ISL_9158184
hCoV-19/USA/NE-CUMC_20314102/2020	EPI_ISL_9158185
hCoV-19/USA/NE-CUMC_20314141/2020	EPI_ISL_9158186
hCoV-19/USA/NE-CUMC_20314143/2020	EPI_ISL_9158187
hCoV-19/USA/NE-CUMC_20314187/2020	EPI_ISL_9158188
hCoV-19/USA/NE-CUMC_20314241/2020	EPI_ISL_9158189
hCoV-19/USA/NE-CUMC_20314279/2020	EPI_ISL_9158190
hCoV-19/USA/NE-CUMC_20321009/2020	EPI_ISL_9158191
hCoV-19/USA/NE-CUMC_20321022/2020	EPI_ISL_9158192
hCoV-19/USA/NE-CUMC_20321034/2020	EPI_ISL_9158193
hCoV-19/USA/NE-CUMC_20321056/2020	EPI_ISL_9158194
hCoV-19/USA/NE-CUMC_20321067/2020	EPI_ISL_9158195
hCoV-19/USA/NE-CUMC_20321115/2020	EPI_ISL_9158196
hCoV-19/USA/NE-CUMC_20321134/2020	EPI_ISL_9158197
hCoV-19/USA/NE-CUMC_20321156/2020	EPI_ISL_9158198
hCoV-19/USA/NE-CUMC_20321177/2020	EPI_ISL_9158199
hCoV-19/USA/NE-CUMC_20321187/2020	EPI_ISL_9158200
hCoV-19/USA/NE-CUMC_20321189/2020	EPI_ISL_9158201
hCoV-19/USA/NE-CUMC_20321253/2020	EPI_ISL_9158203
hCoV-19/USA/NE-CUMC_20321266/2020	EPI_ISL_9158204
hCoV-19/USA/NE-CUMC_20321348/2020	EPI_ISL_9158205
hCoV-19/USA/NE-CUMC_20321356/2020	EPI_ISL_9158206
hCoV-19/USA/NE-CUMC_20321357/2020	EPI_ISL_9158207
hCoV-19/USA/NE-CUMC_20321468/2020	EPI_ISL_9158208
hCoV-19/USA/NE-CUMC_20321517/2020	EPI_ISL_9158209
hCoV-19/USA/NE-CUMC_20321523/2020	EPI_ISL_9158210
hCoV-19/USA/NE-CUMC_20321525/2020	EPI_ISL_9158211
hCoV-19/USA/NE-CUMC_20321527/2020	EPI_ISL_9158212
hCoV-19/USA/NE-CUMC_20328012/2020	EPI_ISL_9158213
hCoV-19/USA/NE-CUMC_20328024/2020	EPI_ISL_9158214
hCoV-19/USA/NE-CUMC_20328087/2020	EPI_ISL_9158215
hCoV-19/USA/NE-CUMC_20328088/2020	EPI_ISL_9158216
hCoV-19/USA/NE-CUMC_20328114/2020	EPI_ISL_9158217
hCoV-19/USA/NE-CUMC_20328165/2020	EPI_ISL_9158218
hCoV-19/USA/NE-CUMC_20328231/2020	EPI_ISL_9158219
hCoV-19/USA/NE-CUMC_20328248/2020	EPI_ISL_9158220
hCoV-19/USA/NE-CUMC_20328261/2020	EPI_ISL_9158221
hCoV-19/USA/NE-CUMC_20328263/2020	EPI_ISL_9158222
hCoV-19/USA/NE-CUMC_20328289/2020	EPI_ISL_9158223
hCoV-19/USA/NE-CUMC_20328291/2020	EPI_ISL_9158224
hCoV-19/USA/NE-CUMC_20328324/2020	EPI_ISL_9158225
hCoV-19/USA/NE-CUMC_20328351/2020	EPI_ISL_9158226
hCoV-19/USA/NE-CUMC_20328360/2020	EPI_ISL_9158227
hCoV-19/USA/NE-CUMC_20328362/2020	EPI_ISL_9158228
hCoV-19/USA/NE-CUMC_20328386/2020	EPI_ISL_9158229
hCoV-19/USA/NE-CUMC_20328424/2020	EPI_ISL_9158230
hCoV-19/USA/NE-CUMC_20328451/2020	EPI_ISL_9158231
hCoV-19/USA/NE-CUMC_20328474/2020	EPI_ISL_9158232
hCoV-19/USA/NE-CUMC_20328495/2020	EPI_ISL_9158233
hCoV-19/USA/NE-CUMC_20328504/2020	EPI_ISL_9158234
hCoV-19/USA/NE-CUMC_20328513/2020	EPI_ISL_9158235
hCoV-19/USA/NE-CUMC_20328514/2020	EPI_ISL_9158236
hCoV-19/USA/NE-CUMC_20328522/2020	EPI_ISL_9158237
hCoV-19/USA/NE-CUMC_20328527/2020	EPI_ISL_9158238
hCoV-19/USA/NE-CUMC_20328560/2020	EPI_ISL_9158239
hCoV-19/USA/NE-CUMC_20328565/2020	EPI_ISL_9158240
hCoV-19/USA/NE-CUMC_20328569/2020	EPI_ISL_9158241
hCoV-19/USA/NE-CUMC_20328583/2020	EPI_ISL_9158242
hCoV-19/USA/NE-CUMC_20328588/2020	EPI_ISL_9158243
hCoV-19/USA/NE-CUMC_20328646/2020	EPI_ISL_9158244
hCoV-19/USA/NE-CUMC_20328649/2020	EPI_ISL_9158245
hCoV-19/USA/NE-CUMC_20328676/2020	EPI_ISL_9158246
hCoV-19/USA/NE-CUMC_20328688/2020	EPI_ISL_9158247
hCoV-19/USA/NE-CUMC_20328689/2020	EPI_ISL_9158248
hCoV-19/USA/NE-CUMC_20329160/2020	EPI_ISL_9158249
hCoV-19/USA/NE-CUMC_20335171/2020	EPI_ISL_9158250
hCoV-19/USA/NE-CUMC_20335218/2020	EPI_ISL_9158251
hCoV-19/USA/NE-CUMC_20335337/2020	EPI_ISL_9158252
hCoV-19/USA/NE-CUMC_20335391/2020	EPI_ISL_9158253
hCoV-19/USA/NE-CUMC_20335473/2020	EPI_ISL_9158254
hCoV-19/USA/NE-CUMC_20335483/2020	EPI_ISL_9158255
hCoV-19/USA/NE-CUMC_20335489/2020	EPI_ISL_9158256
hCoV-19/USA/NE-CUMC_20335494/2020	EPI_ISL_9158257
hCoV-19/USA/NE-CUMC_20335506/2020	EPI_ISL_9158258
hCoV-19/USA/NE-CUMC_20335507/2020	EPI_ISL_9158259
hCoV-19/USA/NE-CUMC_20335520/2020	EPI_ISL_9158260
hCoV-19/USA/NE-CUMC_20335541/2020	EPI_ISL_9158261
hCoV-19/USA/NE-CUMC_20335563/2020	EPI_ISL_9158262
hCoV-19/USA/NE-CUMC_20335589/2020	EPI_ISL_9158263
hCoV-19/USA/NE-CUMC_20335603/2020	EPI_ISL_9158264
hCoV-19/USA/NE-CUMC_20335619/2020	EPI_ISL_9158265
hCoV-19/USA/NE-CUMC_20335635/2020	EPI_ISL_9158266
hCoV-19/USA/NE-CUMC_20335713/2020	EPI_ISL_9158267
hCoV-19/USA/NE-CUMC_20335727/2020	EPI_ISL_9158268
hCoV-19/USA/NE-CUMC_20335782/2020	EPI_ISL_9158269
hCoV-19/USA/NE-CUMC_20335796/2020	EPI_ISL_9158270
hCoV-19/USA/NE-CUMC_20342013/2020	EPI_ISL_9158271
hCoV-19/USA/NE-CUMC_20342023/2020	EPI_ISL_9158272
hCoV-19/USA/NE-CUMC_20342024/2020	EPI_ISL_9158273
hCoV-19/USA/NE-CUMC_20342191/2020	EPI_ISL_9158274
hCoV-19/USA/NE-CUMC_20342232/2020	EPI_ISL_9158275
hCoV-19/USA/NE-CUMC_20342233/2020	EPI_ISL_9158276
hCoV-19/USA/NE-CUMC_20342234/2020	EPI_ISL_9158277
hCoV-19/USA/NE-CUMC_20342298/2020	EPI_ISL_9158278
hCoV-19/USA/NE-CUMC_20342327/2020	EPI_ISL_9158279
hCoV-19/USA/NE-CUMC_20342595/2020	EPI_ISL_9158280
hCoV-19/USA/NE-CUMC_20342608/2020	EPI_ISL_9158281
hCoV-19/USA/NE-CUMC_20342623/2020	EPI_ISL_9158282
hCoV-19/USA/NE-CUMC_20349053/2020	EPI_ISL_9158283
hCoV-19/USA/NE-CUMC_20349195/2020	EPI_ISL_9158284
hCoV-19/USA/NE-CUMC_20349259/2020	EPI_ISL_9158285
hCoV-19/USA/NE-CUMC_20349283/2020	EPI_ISL_9158286
hCoV-19/USA/NE-CUMC_20349284/2020	EPI_ISL_9158287
hCoV-19/USA/NE-CUMC_20349288/2020	EPI_ISL_9158288
hCoV-19/USA/NE-CUMC_20349295/2020	EPI_ISL_9158289
hCoV-19/USA/NE-CUMC_20349300/2020	EPI_ISL_9158290
hCoV-19/USA/NE-CUMC_20349334/2020	EPI_ISL_9158291
hCoV-19/USA/NE-CUMC_20349341/2020	EPI_ISL_9158292
hCoV-19/USA/NE-CUMC_20349371/2020	EPI_ISL_9158293
hCoV-19/USA/NE-CUMC_20349420/2020	EPI_ISL_9158294
hCoV-19/USA/NE-CUMC_20349422/2020	EPI_ISL_9158295
hCoV-19/USA/NE-CUMC_20349451/2020	EPI_ISL_9158296
hCoV-19/USA/NE-CUMC_20349452/2020	EPI_ISL_9158297
hCoV-19/USA/NE-CUMC_20349453/2020	EPI_ISL_9158298
hCoV-19/USA/NE-CUMC_20349474/2020	EPI_ISL_9158299
hCoV-19/USA/NE-CUMC_20349478/2020	EPI_ISL_9158300
hCoV-19/USA/NE-CUMC_20349483/2020	EPI_ISL_9158301
hCoV-19/USA/NE-CUMC_20349505/2020	EPI_ISL_9158302
hCoV-19/USA/NE-CUMC_20349507/2020	EPI_ISL_9158303
hCoV-19/USA/NE-CUMC_20349513/2020	EPI_ISL_9158304
hCoV-19/USA/NE-CUMC_20356152/2020	EPI_ISL_9158305
hCoV-19/USA/NE-CUMC_20356154/2020	EPI_ISL_9158306
hCoV-19/USA/NE-CUMC_20356177/2020	EPI_ISL_9158307
hCoV-19/USA/NE-CUMC_20356187/2020	EPI_ISL_9158308
hCoV-19/USA/NE-CUMC_20356213/2020	EPI_ISL_9158309
hCoV-19/USA/NE-CUMC_20356241/2020	EPI_ISL_9158310
hCoV-19/USA/NE-CUMC_20356257/2020	EPI_ISL_9158311
hCoV-19/USA/NE-CUMC_20356272/2020	EPI_ISL_9158312
hCoV-19/USA/NE-CUMC_20356278/2020	EPI_ISL_9158313
hCoV-19/USA/NE-CUMC_20356282/2020	EPI_ISL_9158314
hCoV-19/USA/NE-CUMC_20356291/2020	EPI_ISL_9158315
hCoV-19/USA/NE-CUMC_20356295/2020	EPI_ISL_9158316
hCoV-19/USA/NE-CUMC_20356314/2020	EPI_ISL_9158317
hCoV-19/USA/NE-CUMC_20356322/2020	EPI_ISL_9158318
hCoV-19/USA/NE-CUMC_20356325/2020	EPI_ISL_9158319
hCoV-19/USA/NE-CUMC_20356330/2020	EPI_ISL_9158320
hCoV-19/USA/NE-CUMC_20356335/2020	EPI_ISL_9158321
hCoV-19/USA/NE-CUMC_20363010/2020	EPI_ISL_9158322
hCoV-19/USA/NE-CUMC_20363035/2020	EPI_ISL_9158323
hCoV-19/USA/NE-CUMC_20363036/2020	EPI_ISL_9158324
hCoV-19/USA/NE-CUMC_20363069/2020	EPI_ISL_9158325
hCoV-19/USA/NE-CUMC_20363201/2020	EPI_ISL_9158326
hCoV-19/USA/NE-CUMC_20363211/2020	EPI_ISL_9158327
hCoV-19/USA/NE-CUMC_20363223/2020	EPI_ISL_9158328
hCoV-19/USA/NE-CUMC_20363236/2020	EPI_ISL_9158329
hCoV-19/USA/NE-CUMC_20363245/2020	EPI_ISL_9158330
hCoV-19/USA/NE-CUMC_20363248/2020	EPI_ISL_9158331
hCoV-19/USA/NE-CUMC_20363252/2020	EPI_ISL_9158332
hCoV-19/USA/NE-CUMC_20363254/2020	EPI_ISL_9158333
hCoV-19/USA/NE-CUMC_20363258/2020	EPI_ISL_9158334
hCoV-19/USA/NE-CUMC_20363275/2020	EPI_ISL_9158335
hCoV-19/USA/NE-CUMC_20363278/2020	EPI_ISL_9158336
hCoV-19/USA/NE-CUMC_20363280/2020	EPI_ISL_9158337
hCoV-19/USA/NE-CUMC_20363284/2020	EPI_ISL_9158338
hCoV-19/USA/NE-CUMC_20363288/2020	EPI_ISL_9158339
hCoV-19/USA/NE-CUMC_20363296/2020	EPI_ISL_9158340
hCoV-19/USA/NE-CUMC_20363303/2020	EPI_ISL_9158341
hCoV-19/USA/NE-CUMC_20363312/2020	EPI_ISL_9158342
hCoV-19/USA/NE-CUMC_20363328/2020	EPI_ISL_9158343
hCoV-19/USA/NE-CUMC_20363330/2020	EPI_ISL_9158344
hCoV-19/USA/NE-CUMC_20363338/2020	EPI_ISL_9158345
hCoV-19/USA/NE-CUMC_21011125/2021	EPI_ISL_9158346
hCoV-19/USA/NE-CUMC_21011129/2021	EPI_ISL_9158347
hCoV-19/USA/NE-CUMC_21011131/2021	EPI_ISL_9158348
hCoV-19/USA/NE-CUMC_21011132/2021	EPI_ISL_9158349
hCoV-19/USA/NE-CUMC_21011145/2021	EPI_ISL_9158350
hCoV-19/USA/NE-CUMC_21011146/2021	EPI_ISL_9158351
hCoV-19/USA/NE-CUMC_21011149/2021	EPI_ISL_9158352
hCoV-19/USA/NE-CUMC_21011150/2021	EPI_ISL_9158353
hCoV-19/USA/NE-CUMC_21011151/2021	EPI_ISL_9158354
hCoV-19/USA/NE-CUMC_21011155/2021	EPI_ISL_9158355
hCoV-19/USA/NE-CUMC_21018007/2021	EPI_ISL_9158356
hCoV-19/USA/NE-CUMC_21018024/2021	EPI_ISL_9158357
hCoV-19/USA/NE-CUMC_21018028/2021	EPI_ISL_9158358
hCoV-19/USA/NE-CUMC_21018097/2021	EPI_ISL_9158359
hCoV-19/USA/NE-CUMC_21018121/2021	EPI_ISL_9158360
hCoV-19/USA/NE-CUMC_21018146/2021	EPI_ISL_9158361
hCoV-19/USA/NE-CUMC_21018183/2021	EPI_ISL_9158362
hCoV-19/USA/NE-CUMC_21018192/2021	EPI_ISL_9158363
hCoV-19/USA/NE-CUMC_21018269/2021	EPI_ISL_9158364
hCoV-19/USA/NE-CUMC_21018270/2021	EPI_ISL_9158365
hCoV-19/USA/NE-CUMC_21018277/2021	EPI_ISL_9158366
hCoV-19/USA/NE-CUMC_21018278/2021	EPI_ISL_9158367
hCoV-19/USA/NE-CUMC_21018293/2021	EPI_ISL_9158368
hCoV-19/USA/NE-CUMC_21018294/2021	EPI_ISL_9158369
hCoV-19/USA/NE-CUMC_21018296/2021	EPI_ISL_9158370
hCoV-19/USA/NE-CUMC_21018303/2021	EPI_ISL_9158371
hCoV-19/USA/NE-CUMC_21018304/2021	EPI_ISL_9158372
hCoV-19/USA/NE-CUMC_21018316/2021	EPI_ISL_9158373
hCoV-19/USA/NE-CUMC_21025021/2021	EPI_ISL_9158374
hCoV-19/USA/NE-CUMC_21025037/2021	EPI_ISL_9158375
hCoV-19/USA/NE-CUMC_21025038/2021	EPI_ISL_9158376
hCoV-19/USA/NE-CUMC_21025072/2021	EPI_ISL_9158377
hCoV-19/USA/NE-CUMC_21025079/2021	EPI_ISL_9158378
hCoV-19/USA/NE-CUMC_21025118/2021	EPI_ISL_9158379
hCoV-19/USA/NE-CUMC_21025119/2021	EPI_ISL_9158380
hCoV-19/USA/NE-CUMC_21025120/2021	EPI_ISL_9158381
hCoV-19/USA/NE-CUMC_21025148/2021	EPI_ISL_9158382
hCoV-19/USA/NE-CUMC_21025169/2021	EPI_ISL_9158383
hCoV-19/USA/NE-CUMC_21025175/2021	EPI_ISL_9158384
hCoV-19/USA/NE-CUMC_21025193/2021	EPI_ISL_9158385
hCoV-19/USA/NE-CUMC_21025207/2021	EPI_ISL_9158386
hCoV-19/USA/NE-CUMC_21025211/2021	EPI_ISL_9158387
hCoV-19/USA/NE-CUMC_21025212/2021	EPI_ISL_9158388
hCoV-19/USA/NE-CUMC_21025214/2021	EPI_ISL_9158389
hCoV-19/USA/NE-CUMC_21025215/2021	EPI_ISL_9158390
hCoV-19/USA/NE-CUMC_21025217/2021	EPI_ISL_9158391
hCoV-19/USA/NE-CUMC_21025219/2021	EPI_ISL_9158392
hCoV-19/USA/NE-CUMC_21025225/2021	EPI_ISL_9158393
hCoV-19/USA/NE-CUMC_21025226/2021	EPI_ISL_9158394
hCoV-19/USA/NE-CUMC_21031047/2021	EPI_ISL_9158395
hCoV-19/USA/NE-CUMC_21031083/2021	EPI_ISL_9158396
hCoV-19/USA/NE-CUMC_21031084/2021	EPI_ISL_9158397
hCoV-19/USA/NE-CUMC_21031097/2021	EPI_ISL_9158398
hCoV-19/USA/NE-CUMC_21031121/2021	EPI_ISL_9158399
hCoV-19/USA/NE-CUMC_21031145/2021	EPI_ISL_9158400
hCoV-19/USA/NE-CUMC_21031149/2021	EPI_ISL_9158401
hCoV-19/USA/NE-CUMC_21031154/2021	EPI_ISL_9158402
hCoV-19/USA/NE-CUMC_21031158/2021	EPI_ISL_9158403
hCoV-19/USA/NE-CUMC_21031159/2021	EPI_ISL_9158404
hCoV-19/USA/NE-CUMC_21039010/2021	EPI_ISL_9158405
hCoV-19/USA/NE-CUMC_21039015/2021	EPI_ISL_9158406
hCoV-19/USA/NE-CUMC_21039019/2021	EPI_ISL_9158407
hCoV-19/USA/NE-CUMC_21039022/2021	EPI_ISL_9158408
hCoV-19/USA/NE-CUMC_21039024/2021	EPI_ISL_9158409
hCoV-19/USA/NE-CUMC_21039026/2021	EPI_ISL_9158410
hCoV-19/USA/NE-CUMC_21039030/2021	EPI_ISL_9158411
hCoV-19/USA/NE-CUMC_21039031/2021	EPI_ISL_9158412
hCoV-19/USA/NE-CUMC_21039032/2021	EPI_ISL_9158413
hCoV-19/USA/NE-CUMC_21039057/2021	EPI_ISL_9158414
hCoV-19/USA/NE-CUMC_21039058/2021	EPI_ISL_9158415
hCoV-19/USA/NE-CUMC_21039062/2021	EPI_ISL_9158416
hCoV-19/USA/NE-CUMC_21039063/2021	EPI_ISL_9158417
hCoV-19/USA/NE-CUMC_21039064/2021	EPI_ISL_9158418
hCoV-19/USA/NE-CUMC_21039065/2021	EPI_ISL_9158419
hCoV-19/USA/NE-CUMC_21039070/2021	EPI_ISL_9158420
hCoV-19/USA/NE-CUMC_21039075/2021	EPI_ISL_9158421
hCoV-19/USA/NE-CUMC_21039076/2021	EPI_ISL_9158422
hCoV-19/USA/NE-CUMC_21039077/2021	EPI_ISL_9158423
hCoV-19/USA/NE-CUMC_21039078/2021	EPI_ISL_9158424
hCoV-19/USA/NE-CUMC_21039080/2021	EPI_ISL_9158425
hCoV-19/USA/NE-CUMC_21081001/2021	EPI_ISL_1822132
hCoV-19/USA/NE-CUMC_21081002/2021	EPI_ISL_1822133
hCoV-19/USA/NE-CUMC_21081003/2021	EPI_ISL_1822134
hCoV-19/USA/NE-CUMC_21081004/2021	EPI_ISL_1822135
hCoV-19/USA/NE-CUMC_21081005/2021	EPI_ISL_1822136
hCoV-19/USA/NE-CUMC_21081006/2021	EPI_ISL_1822137
hCoV-19/USA/NE-CUMC_21081007/2021	EPI_ISL_1822138
hCoV-19/USA/NE-CUMC_21081008/2021	EPI_ISL_1822139
hCoV-19/USA/NE-CUMC_21081009/2021	EPI_ISL_1822140
hCoV-19/USA/NE-CUMC_21081010/2021	EPI_ISL_1822141
hCoV-19/USA/NE-CUMC_21081011/2021	EPI_ISL_1822142
hCoV-19/USA/NE-CUMC_21081012/2021	EPI_ISL_1822143
hCoV-19/USA/NE-CUMC_21081013/2021	EPI_ISL_1822144
hCoV-19/USA/NE-CUMC_21081014/2021	EPI_ISL_1822145
hCoV-19/USA/NE-CUMC_21081015/2021	EPI_ISL_1822146
hCoV-19/USA/NE-CUMC_21081016/2021	EPI_ISL_1822147
hCoV-19/USA/NE-CUMC_21081017/2021	EPI_ISL_1822148
hCoV-19/USA/NE-CUMC_21081018/2021	EPI_ISL_1822149
hCoV-19/USA/NE-CUMC_21081019/2021	EPI_ISL_1822150
hCoV-19/USA/NE-CUMC_21081020/2021	EPI_ISL_1822151
hCoV-19/USA/NE-CUMC_21081021/2021	EPI_ISL_1822152
hCoV-19/USA/NE-CUMC_21081022/2021	EPI_ISL_1822153
hCoV-19/USA/NE-CUMC_21081023/2021	EPI_ISL_1822154
hCoV-19/USA/NE-CUMC_21081024/2021	EPI_ISL_1822155
hCoV-19/USA/NE-CUMC_21081025/2021	EPI_ISL_1822156
hCoV-19/USA/NE-CUMC_21081026/2021	EPI_ISL_1822157
hCoV-19/USA/NE-CUMC_21081028/2021	EPI_ISL_1822158
hCoV-19/USA/NE-CUMC_21081029/2021	EPI_ISL_1822159
hCoV-19/USA/NE-CUMC_21081030/2021	EPI_ISL_1822160
hCoV-19/USA/NE-CUMC_21081031/2021	EPI_ISL_1822161
hCoV-19/USA/NE-CUMC_21081032/2021	EPI_ISL_1822162
hCoV-19/USA/NE-CUMC_21081034/2021	EPI_ISL_1822163
hCoV-19/USA/NE-CUMC_21081035/2021	EPI_ISL_1822164
hCoV-19/USA/NE-CUMC_21081036/2021	EPI_ISL_1822165
hCoV-19/USA/NE-CUMC_21081037/2021	EPI_ISL_1822166
hCoV-19/USA/NE-CUMC_21081038/2021	EPI_ISL_1822167
hCoV-19/USA/NE-CUMC_21081039/2021	EPI_ISL_1822168
hCoV-19/USA/NE-CUMC_21081040/2021	EPI_ISL_1822169
hCoV-19/USA/NE-CUMC_21081041/2021	EPI_ISL_1822170
hCoV-19/USA/NE-CUMC_21081042/2021	EPI_ISL_1822171
hCoV-19/USA/NE-CUMC_21081043/2021	EPI_ISL_1822172
hCoV-19/USA/NE-CUMC_21081044/2021	EPI_ISL_1822173
hCoV-19/USA/NE-CUMC_21081045/2021	EPI_ISL_1822174
hCoV-19/USA/NE-CUMC_21081046/2021	EPI_ISL_1822175
hCoV-19/USA/NE-CUMC_21081047/2021	EPI_ISL_1822176
hCoV-19/USA/NE-CUMC_21081048/2021	EPI_ISL_1822177
hCoV-19/USA/NE-CUMC_21081049/2021	EPI_ISL_1822178
hCoV-19/USA/NE-CUMC_21081050/2021	EPI_ISL_1822179
hCoV-19/USA/NE-CUMC_21081051/2021	EPI_ISL_1822180
hCoV-19/USA/NE-CUMC_21081052/2021	EPI_ISL_1822181
hCoV-19/USA/NE-CUMC_21081053/2021	EPI_ISL_1822182
hCoV-19/USA/NE-CUMC_21081054/2021	EPI_ISL_1822183
hCoV-19/USA/NE-CUMC_21081055/2021	EPI_ISL_1822184
hCoV-19/USA/NE-CUMC_21081056/2021	EPI_ISL_1822185
hCoV-19/USA/NE-CUMC_21081057/2021	EPI_ISL_1822186
hCoV-19/USA/NE-CUMC_21081058/2021	EPI_ISL_1822187
hCoV-19/USA/NE-CUMC_21081060/2021	EPI_ISL_1822188
hCoV-19/USA/NE-CUMC_21081061/2021	EPI_ISL_1822189
hCoV-19/USA/NE-CUMC_21081062/2021	EPI_ISL_1822190
hCoV-19/USA/NE-CUMC_21081063/2021	EPI_ISL_1822191
hCoV-19/USA/NE-CUMC_21081064/2021	EPI_ISL_1822192
hCoV-19/USA/NE-CUMC_21081065/2021	EPI_ISL_1822193
hCoV-19/USA/NE-CUMC_21081066/2021	EPI_ISL_1822194
hCoV-19/USA/NE-CUMC_21081067/2021	EPI_ISL_1822195
hCoV-19/USA/NE-CUMC_21081068/2021	EPI_ISL_1822196
hCoV-19/USA/NE-CUMC_21081069/2021	EPI_ISL_1822197
hCoV-19/USA/NE-CUMC_21081070/2021	EPI_ISL_1822198
hCoV-19/USA/NE-CUMC_21081071/2021	EPI_ISL_1822199
hCoV-19/USA/NE-CUMC_21081072/2021	EPI_ISL_1822200
hCoV-19/USA/NE-CUMC_21081073/2021	EPI_ISL_1822201
hCoV-19/USA/NE-CUMC_21081074/2021	EPI_ISL_1822202
hCoV-19/USA/NE-CUMC_21081075/2021	EPI_ISL_1822203
hCoV-19/USA/NE-CUMC_21081076/2021	EPI_ISL_1822204
hCoV-19/USA/NE-CUMC_21081077/2021	EPI_ISL_1822205
hCoV-19/USA/NE-CUMC_21081078/2021	EPI_ISL_1822206
hCoV-19/USA/NE-CUMC_21081079/2021	EPI_ISL_1822207
hCoV-19/USA/NE-CUMC_21081080/2021	EPI_ISL_1822208
hCoV-19/USA/NE-CUMC_21081081/2021	EPI_ISL_1822209
hCoV-19/USA/NE-CUMC_21081082/2021	EPI_ISL_1822210
hCoV-19/USA/NE-CUMC_21081083/2021	EPI_ISL_1822211
hCoV-19/USA/NE-CUMC_21081084/2021	EPI_ISL_1822212
hCoV-19/USA/NE-CUMC_21081085/2021	EPI_ISL_1822213
hCoV-19/USA/NE-CUMC_21081086/2021	EPI_ISL_1822214
hCoV-19/USA/NE-CUMC_21081087/2021	EPI_ISL_1822215
hCoV-19/USA/NE-CUMC_21081088/2021	EPI_ISL_1822216
hCoV-19/USA/NE-CUMC_21081089/2021	EPI_ISL_1822217
hCoV-19/USA/NE-CUMC_21081090/2021	EPI_ISL_1822218
hCoV-19/USA/NE-CUMC_21081091/2021	EPI_ISL_1822219
hCoV-19/USA/NE-CUMC_21081092/2021	EPI_ISL_1822220
hCoV-19/USA/NE-CUMC_21081093/2021	EPI_ISL_1822221
hCoV-19/USA/NE-CUMC_21081094/2021	EPI_ISL_1822222
hCoV-19/USA/NE-CUMC_21081095/2021	EPI_ISL_1822223
hCoV-19/USA/NE-CUMC_21081096/2021	EPI_ISL_1822224
hCoV-19/USA/NE-CUMC_21088001/2021	EPI_ISL_1822225
hCoV-19/USA/NE-CUMC_21088002/2021	EPI_ISL_1822226
hCoV-19/USA/NE-CUMC_21088003/2021	EPI_ISL_1822227
hCoV-19/USA/NE-CUMC_21088004/2021	EPI_ISL_1822228
hCoV-19/USA/NE-CUMC_21088005/2021	EPI_ISL_1822229
hCoV-19/USA/NE-CUMC_21088006/2021	EPI_ISL_1822230
hCoV-19/USA/NE-CUMC_21088007/2021	EPI_ISL_1822231
hCoV-19/USA/NE-CUMC_21088008/2021	EPI_ISL_1822232
hCoV-19/USA/NE-CUMC_21088009/2021	EPI_ISL_1822233
hCoV-19/USA/NE-CUMC_21088010/2021	EPI_ISL_1822234
hCoV-19/USA/NE-CUMC_21088011/2021	EPI_ISL_1822235
hCoV-19/USA/NE-CUMC_21088012/2021	EPI_ISL_1822236
hCoV-19/USA/NE-CUMC_21088013/2021	EPI_ISL_1822237
hCoV-19/USA/NE-CUMC_21088014/2021	EPI_ISL_1822238
hCoV-19/USA/NE-CUMC_21088015/2021	EPI_ISL_1822239
hCoV-19/USA/NE-CUMC_21088016/2021	EPI_ISL_1822240
hCoV-19/USA/NE-CUMC_21088017/2021	EPI_ISL_1822241
hCoV-19/USA/NE-CUMC_21088018/2021	EPI_ISL_1822242
hCoV-19/USA/NE-CUMC_21088019/2021	EPI_ISL_1822243
hCoV-19/USA/NE-CUMC_21088021/2021	EPI_ISL_1822244
hCoV-19/USA/NE-CUMC_21088022/2021	EPI_ISL_1822245
hCoV-19/USA/NE-CUMC_21088023/2021	EPI_ISL_1822246
hCoV-19/USA/NE-CUMC_21088024/2021	EPI_ISL_1822247
hCoV-19/USA/NE-CUMC_21088026/2021	EPI_ISL_1822248
hCoV-19/USA/NE-CUMC_21088027/2021	EPI_ISL_1822249
hCoV-19/USA/NE-CUMC_21088028/2021	EPI_ISL_1822250
hCoV-19/USA/NE-CUMC_21088029/2021	EPI_ISL_1822251
hCoV-19/USA/NE-CUMC_21088030/2021	EPI_ISL_1822252
hCoV-19/USA/NE-CUMC_21088031/2021	EPI_ISL_1822253
hCoV-19/USA/NE-CUMC_21088032/2021	EPI_ISL_1822254
hCoV-19/USA/NE-CUMC_21088033/2021	EPI_ISL_1822255
hCoV-19/USA/NE-CUMC_21088034/2021	EPI_ISL_1822256
hCoV-19/USA/NE-CUMC_21088035/2021	EPI_ISL_1822257
hCoV-19/USA/NE-CUMC_21088036/2021	EPI_ISL_1822258
hCoV-19/USA/NE-CUMC_21088037/2021	EPI_ISL_1822259
hCoV-19/USA/NE-CUMC_21088038/2021	EPI_ISL_1822260
hCoV-19/USA/NE-CUMC_21088039/2021	EPI_ISL_1822261
hCoV-19/USA/NE-CUMC_21088040/2021	EPI_ISL_1822262
hCoV-19/USA/NE-CUMC_21088041/2021	EPI_ISL_1822263
hCoV-19/USA/NE-CUMC_21088042/2021	EPI_ISL_1822264
hCoV-19/USA/NE-CUMC_21088043/2021	EPI_ISL_1822265
hCoV-19/USA/NE-CUMC_21088044/2021	EPI_ISL_1822266
hCoV-19/USA/NE-CUMC_21088046/2021	EPI_ISL_1822267
hCoV-19/USA/NE-CUMC_21088047/2021	EPI_ISL_1822268
hCoV-19/USA/NE-CUMC_21088048/2021	EPI_ISL_1822269
hCoV-19/USA/NE-CUMC_21088049/2021	EPI_ISL_1822270
hCoV-19/USA/NE-CUMC_21088050/2021	EPI_ISL_1822271
hCoV-19/USA/NE-CUMC_21088051/2021	EPI_ISL_1822272
hCoV-19/USA/NE-CUMC_21088052/2021	EPI_ISL_1822273
hCoV-19/USA/NE-CUMC_21088053/2021	EPI_ISL_1822274
hCoV-19/USA/NE-CUMC_21088054/2021	EPI_ISL_1822275
hCoV-19/USA/NE-CUMC_21088055/2021	EPI_ISL_1822276
hCoV-19/USA/NE-CUMC_21088056/2021	EPI_ISL_1822277
hCoV-19/USA/NE-CUMC_21088057/2021	EPI_ISL_1822278
hCoV-19/USA/NE-CUMC_21088058/2021	EPI_ISL_1822279
hCoV-19/USA/NE-CUMC_21088059/2021	EPI_ISL_1822280
hCoV-19/USA/NE-CUMC_21088060/2021	EPI_ISL_1822281
hCoV-19/USA/NE-CUMC_21088061/2021	EPI_ISL_1822282
hCoV-19/USA/NE-CUMC_21088062/2021	EPI_ISL_1822283
hCoV-19/USA/NE-CUMC_21088063/2021	EPI_ISL_1822284
hCoV-19/USA/NE-CUMC_21088064/2021	EPI_ISL_1822285
hCoV-19/USA/NE-CUMC_21088065/2021	EPI_ISL_1822286
hCoV-19/USA/NE-CUMC_21088066/2021	EPI_ISL_1822287
hCoV-19/USA/NE-CUMC_21088068/2021	EPI_ISL_1822288
hCoV-19/USA/NE-CUMC_21088069/2021	EPI_ISL_1822289
hCoV-19/USA/NE-CUMC_21088070/2021	EPI_ISL_1822290
hCoV-19/USA/NE-CUMC_21088071/2021	EPI_ISL_1822291
hCoV-19/USA/NE-CUMC_21088072/2021	EPI_ISL_1822292
hCoV-19/USA/NE-CUMC_21088073/2021	EPI_ISL_1822293
hCoV-19/USA/NE-CUMC_21088074/2021	EPI_ISL_1822294
hCoV-19/USA/NE-CUMC_21088075/2021	EPI_ISL_1822295
hCoV-19/USA/NE-CUMC_21088076/2021	EPI_ISL_1822296
hCoV-19/USA/NE-CUMC_21088077/2021	EPI_ISL_1822297
hCoV-19/USA/NE-CUMC_21088078/2021	EPI_ISL_1822298
hCoV-19/USA/NE-CUMC_21088079/2021	EPI_ISL_1822299
hCoV-19/USA/NE-CUMC_21088080/2021	EPI_ISL_1822300
hCoV-19/USA/NE-CUMC_21088081/2021	EPI_ISL_1822301
hCoV-19/USA/NE-CUMC_21088082/2021	EPI_ISL_1822302
hCoV-19/USA/NE-CUMC_21088083/2021	EPI_ISL_1822303
hCoV-19/USA/NE-CUMC_21088084/2021	EPI_ISL_1822304
hCoV-19/USA/NE-CUMC_21088085/2021	EPI_ISL_1822305
hCoV-19/USA/NE-CUMC_21088086/2021	EPI_ISL_1822306
hCoV-19/USA/NE-CUMC_21088087/2021	EPI_ISL_1822307
hCoV-19/USA/NE-CUMC_21088088/2021	EPI_ISL_1822308
hCoV-19/USA/NE-CUMC_21088089/2021	EPI_ISL_1822309
hCoV-19/USA/NE-CUMC_21088090/2021	EPI_ISL_1822310
hCoV-19/USA/NE-CUMC_21088092/2021	EPI_ISL_1822311
hCoV-19/USA/NE-CUMC_21088093/2021	EPI_ISL_1822312
hCoV-19/USA/NE-CUMC_21088094/2021	EPI_ISL_1822313
hCoV-19/USA/NE-CUMC_21088095/2021	EPI_ISL_1822314
hCoV-19/USA/NE-CUMC_21088096/2021	EPI_ISL_1822315
hCoV-19/USA/NE-CUMC_21095012/2021	EPI_ISL_1822327
hCoV-19/USA/NE-CUMC_21095013/2021	EPI_ISL_1822328
hCoV-19/USA/NE-CUMC_21095014/2021	EPI_ISL_1822329
hCoV-19/USA/NE-CUMC_21095015/2021	EPI_ISL_1822330
hCoV-19/USA/NE-CUMC_21095016/2021	EPI_ISL_1822331
hCoV-19/USA/NE-CUMC_21095017/2021	EPI_ISL_1822332
hCoV-19/USA/NE-CUMC_21095018/2021	EPI_ISL_1822333
hCoV-19/USA/NE-CUMC_21095019/2021	EPI_ISL_1822334
hCoV-19/USA/NE-CUMC_21095020/2021	EPI_ISL_1822335
hCoV-19/USA/NE-CUMC_21095021/2021	EPI_ISL_1822336
hCoV-19/USA/NE-CUMC_21095022/2021	EPI_ISL_1822337
hCoV-19/USA/NE-CUMC_21095023/2021	EPI_ISL_1822338
hCoV-19/USA/NE-CUMC_21095024/2021	EPI_ISL_1822339
hCoV-19/USA/NE-CUMC_21095025/2021	EPI_ISL_1822340
hCoV-19/USA/NE-CUMC_21095026/2021	EPI_ISL_1822341
hCoV-19/USA/NE-CUMC_21095027/2021	EPI_ISL_1822342
hCoV-19/USA/NE-CUMC_21095030/2021	EPI_ISL_1822345
hCoV-19/USA/NE-CUMC_21095031/2021	EPI_ISL_1822346
hCoV-19/USA/NE-CUMC_21095032/2021	EPI_ISL_1822347
hCoV-19/USA/NE-CUMC_21095033/2021	EPI_ISL_1822348
hCoV-19/USA/NE-CUMC_21095034/2021	EPI_ISL_1822349
hCoV-19/USA/NE-CUMC_21095035/2021	EPI_ISL_1822350
hCoV-19/USA/NE-CUMC_21095036/2021	EPI_ISL_1822351
hCoV-19/USA/NE-CUMC_21095037/2021	EPI_ISL_1822352
hCoV-19/USA/NE-CUMC_21095038/2021	EPI_ISL_1822353
hCoV-19/USA/NE-CUMC_21095039/2021	EPI_ISL_1822354
hCoV-19/USA/NE-CUMC_21095040/2021	EPI_ISL_1822355
hCoV-19/USA/NE-CUMC_21095041/2021	EPI_ISL_1822356
hCoV-19/USA/NE-CUMC_21095042/2021	EPI_ISL_1822357
hCoV-19/USA/NE-CUMC_21095043/2021	EPI_ISL_1822358
hCoV-19/USA/NE-CUMC_21095044/2021	EPI_ISL_1822359
hCoV-19/USA/NE-CUMC_21095045/2021	EPI_ISL_1822360
hCoV-19/USA/NE-CUMC_21095046/2021	EPI_ISL_1822361
hCoV-19/USA/NE-CUMC_21095047/2021	EPI_ISL_1822362
hCoV-19/USA/NE-CUMC_21095048/2021	EPI_ISL_1822363
hCoV-19/USA/NE-CUMC_21095049/2021	EPI_ISL_1822364
hCoV-19/USA/NE-CUMC_21095050/2021	EPI_ISL_1822365
hCoV-19/USA/NE-CUMC_21095051/2021	EPI_ISL_1822366
hCoV-19/USA/NE-CUMC_21095052/2021	EPI_ISL_1822367
hCoV-19/USA/NE-CUMC_21095053/2021	EPI_ISL_1822368
hCoV-19/USA/NE-CUMC_21095054/2021	EPI_ISL_1822369
hCoV-19/USA/NE-CUMC_21095055/2021	EPI_ISL_1822370
hCoV-19/USA/NE-CUMC_21095056/2021	EPI_ISL_1822371
hCoV-19/USA/NE-CUMC_21095057/2021	EPI_ISL_1822372
hCoV-19/USA/NE-CUMC_21095058/2021	EPI_ISL_1822373
hCoV-19/USA/NE-CUMC_21095059/2021	EPI_ISL_1822374
hCoV-19/USA/NE-CUMC_21095060/2021	EPI_ISL_1822375
hCoV-19/USA/NE-CUMC_21095061/2021	EPI_ISL_1822376
hCoV-19/USA/NE-CUMC_21095062/2021	EPI_ISL_1822377
hCoV-19/USA/NE-CUMC_21095063/2021	EPI_ISL_1822378
hCoV-19/USA/NE-CUMC_21095064/2021	EPI_ISL_1822379
hCoV-19/USA/NE-CUMC_21095065/2021	EPI_ISL_1822380
hCoV-19/USA/NE-CUMC_21095066/2021	EPI_ISL_1822381
hCoV-19/USA/NE-CUMC_21095067/2021	EPI_ISL_1822382
hCoV-19/USA/NE-CUMC_21095068/2021	EPI_ISL_1822383
hCoV-19/USA/NE-CUMC_21095069/2021	EPI_ISL_1822384
hCoV-19/USA/NE-CUMC_21095070/2021	EPI_ISL_1822385
hCoV-19/USA/NE-CUMC_21095071/2021	EPI_ISL_1822386
hCoV-19/USA/NE-CUMC_21095072/2021	EPI_ISL_1822387
hCoV-19/USA/NE-CUMC_21095073/2021	EPI_ISL_1822388
hCoV-19/USA/NE-CUMC_21095074/2021	EPI_ISL_1822389
hCoV-19/USA/NE-CUMC_21095076/2021	EPI_ISL_1822390
hCoV-19/USA/NE-CUMC_21095077/2021	EPI_ISL_1822391
hCoV-19/USA/NE-CUMC_21102092/2021	EPI_ISL_1822495
hCoV-19/USA/NE-CUMC_21102093/2021	EPI_ISL_1822497
hCoV-19/USA/NE-CUMC_21102094/2021	EPI_ISL_1822499
hCoV-19/USA/NE-CUMC_21144025/2021	EPI_ISL_2562662
hCoV-19/USA/NE-CUMC_21144026/2021	EPI_ISL_2562663
hCoV-19/USA/NE-CUMC_21144027/2021	EPI_ISL_2562664
hCoV-19/USA/NE-CUMC_21144028/2021	EPI_ISL_2562665
hCoV-19/USA/NE-CUMC_21144029/2021	EPI_ISL_2562666
hCoV-19/USA/NE-CUMC_21144032/2021	EPI_ISL_2562667
hCoV-19/USA/NE-CUMC_21144033/2021	EPI_ISL_2562668
hCoV-19/USA/NE-CUMC_21144034/2021	EPI_ISL_2562669
hCoV-19/USA/NE-CUMC_21144035/2021	EPI_ISL_2562670
hCoV-19/USA/NE-CUMC_21144036/2021	EPI_ISL_2562671
hCoV-19/USA/NE-CUMC_21144037/2021	EPI_ISL_2562672
hCoV-19/USA/NE-CUMC_21144038/2021	EPI_ISL_2562673
hCoV-19/USA/NE-CUMC_21144039/2021	EPI_ISL_2562674
hCoV-19/USA/NE-CUMC_21144041/2021	EPI_ISL_2562675
hCoV-19/USA/NE-CUMC_21144042/2021	EPI_ISL_2562676
hCoV-19/USA/NE-CUMC_21144043/2021	EPI_ISL_2562677
hCoV-19/USA/NE-CUMC_21144044/2021	EPI_ISL_2562678
hCoV-19/USA/NE-CUMC_21144045/2021	EPI_ISL_2562679
hCoV-19/USA/NE-CUMC_21144046/2021	EPI_ISL_2562680
hCoV-19/USA/NE-CUMC_21144047/2021	EPI_ISL_2562681
hCoV-19/USA/NE-CUMC_21144048/2021	EPI_ISL_2562682
hCoV-19/USA/NE-CUMC_21144049/2021	EPI_ISL_2562683
hCoV-19/USA/NE-CUMC_21144050/2021	EPI_ISL_2562684
hCoV-19/USA/NE-CUMC_21144051/2021	EPI_ISL_2562685
hCoV-19/USA/NE-CUMC_21144052/2021	EPI_ISL_2562686
hCoV-19/USA/NE-CUMC_21144054/2021	EPI_ISL_2562687
hCoV-19/USA/NE-CUMC_21144055/2021	EPI_ISL_2562688
hCoV-19/USA/NE-CUMC_21144056/2021	EPI_ISL_2562689
hCoV-19/USA/NE-CUMC_21144057/2021	EPI_ISL_2562690
hCoV-19/USA/NE-CUMC_21144058/2021	EPI_ISL_2562691
hCoV-19/USA/NE-CUMC_21144059/2021	EPI_ISL_2562692
hCoV-19/USA/NE-CUMC_21144060/2021	EPI_ISL_2562693
hCoV-19/USA/NE-CUMC_21144062/2021	EPI_ISL_2562695
hCoV-19/USA/NE-CUMC_21144063/2021	EPI_ISL_2562696
hCoV-19/USA/NE-CUMC_21144064/2021	EPI_ISL_2562697
hCoV-19/USA/NE-CUMC_21144065/2021	EPI_ISL_2562698
hCoV-19/USA/NE-CUMC_21144066/2021	EPI_ISL_2562699
hCoV-19/USA/NE-CUMC_21144068/2021	EPI_ISL_2562701
hCoV-19/USA/NE-CUMC_21144069/2021	EPI_ISL_2562702
hCoV-19/USA/NE-CUMC_21144091/2021	EPI_ISL_2562720
hCoV-19/USA/NE-CUMC_21144092/2021	EPI_ISL_2562721
hCoV-19/USA/NE-CUMC_21144093/2021	EPI_ISL_2562722
hCoV-19/USA/NE-CUMC_21144094/2021	EPI_ISL_2562723
hCoV-19/USA/NE-CUMC_21144095/2021	EPI_ISL_2562724
hCoV-19/USA/NE-CUMC_20093002/2020	EPI_ISL_12203950
hCoV-19/USA/NE-CUMC_20093003/2020	EPI_ISL_12203951
hCoV-19/USA/NE-CUMC_20097001/2020	EPI_ISL_12203952
hCoV-19/USA/NE-CUMC_20097005/2020	EPI_ISL_12203953
hCoV-19/USA/NE-CUMC_20122019/2020	EPI_ISL_12203954
hCoV-19/USA/NE-CUMC_20122023/2020	EPI_ISL_12203955
hCoV-19/USA/NE-CUMC_20197020/2020	EPI_ISL_12203956
hCoV-19/USA/NE-CUMC_20293165/2020	EPI_ISL_12203957
hCoV-19/USA/NE-CUMC_20293180/2020	EPI_ISL_12203958
hCoV-19/USA/NE-CUMC_20293184/2020	EPI_ISL_12203959
hCoV-19/USA/NE-CUMC_20342068/2020	EPI_ISL_12203960
hCoV-19/USA/NE-CUMC_21004146/2021	EPI_ISL_12203961
hCoV-19/USA/NE-CUMC_21004148/2021	EPI_ISL_12203962
hCoV-19/USA/NE-CUMC_21004169/2021	EPI_ISL_12203963
hCoV-19/USA/NE-CUMC_21004176/2021	EPI_ISL_12203964
hCoV-19/USA/NE-CUMC_21004213/2021	EPI_ISL_12203965
hCoV-19/USA/NE-CUMC_21004218/2021	EPI_ISL_12203966
hCoV-19/USA/NE-CUMC_21004224/2021	EPI_ISL_12203967
hCoV-19/USA/NE-CUMC_21004225/2021	EPI_ISL_12203968
hCoV-19/USA/NE-CUMC_21004228/2021	EPI_ISL_12203969
hCoV-19/USA/NE-CUMC_21004239/2021	EPI_ISL_12203970
hCoV-19/USA/NE-CUMC_21011014/2021	EPI_ISL_12203971
hCoV-19/USA/NE-CUMC_21011019/2021	EPI_ISL_12203972
hCoV-19/USA/NE-CUMC_21011060/2021	EPI_ISL_12203973
hCoV-19/USA/NE-CUMC_21011188/2021	EPI_ISL_12203974
hCoV-19/USA/NE-CUMC_21011220/2021	EPI_ISL_12203975
hCoV-19/USA/NE-CUMC_21011230/2021	EPI_ISL_12203976
hCoV-19/USA/NE-CUMC_21011244/2021	EPI_ISL_12203977
hCoV-19/USA/NE-CUMC_21011248/2021	EPI_ISL_12203978
hCoV-19/USA/NE-CUMC_21011268/2021	EPI_ISL_12203979
hCoV-19/USA/NE-CUMC_21011269/2021	EPI_ISL_12203980
hCoV-19/USA/NE-CUMC_21116098/2021	EPI_ISL_12203981
hCoV-19/USA/NE-CUMC_21116099/2021	EPI_ISL_12203982
hCoV-19/USA/NE-CUMC_21116101/2021	EPI_ISL_12203983
hCoV-19/USA/NE-CUMC_21116102/2021	EPI_ISL_12203984
hCoV-19/USA/NE-CUMC_21116104/2021	EPI_ISL_12203985
hCoV-19/USA/NE-CUMC_21116105/2021	EPI_ISL_12203986
hCoV-19/USA/NE-CUMC_21116106/2021	EPI_ISL_12203987
hCoV-19/USA/NE-CUMC_21116107/2021	EPI_ISL_12203988
hCoV-19/USA/NE-CUMC_21116108/2021	EPI_ISL_12203989
hCoV-19/USA/NE-CUMC_21116110/2021	EPI_ISL_12203990
hCoV-19/USA/NE-CUMC_21116114/2021	EPI_ISL_12203991
hCoV-19/USA/NE-CUMC_21116116/2021	EPI_ISL_12203992
hCoV-19/USA/NE-CUMC_21116117/2021	EPI_ISL_12203993
hCoV-19/USA/NE-CUMC_21116118/2021	EPI_ISL_12203994
hCoV-19/USA/NE-CUMC_21116121/2021	EPI_ISL_12203995
hCoV-19/USA/NE-CUMC_21116122/2021	EPI_ISL_12203996
hCoV-19/USA/NE-CUMC_21116123/2021	EPI_ISL_12203997
hCoV-19/USA/NE-CUMC_21116125/2021	EPI_ISL_12203998
hCoV-19/USA/NE-CUMC_21116127/2021	EPI_ISL_12203999
hCoV-19/USA/NE-CUMC_21116128/2021	EPI_ISL_12204000
hCoV-19/USA/NE-CUMC_21116130/2021	EPI_ISL_12204001
hCoV-19/USA/NE-CUMC_21116131/2021	EPI_ISL_12204002
hCoV-19/USA/NE-CUMC_21116132/2021	EPI_ISL_12204003
hCoV-19/USA/NE-CUMC_21116134/2021	EPI_ISL_12204004
hCoV-19/USA/NE-CUMC_21116135/2021	EPI_ISL_12204005
hCoV-19/USA/NE-CUMC_21116139/2021	EPI_ISL_12204006
hCoV-19/USA/NE-CUMC_21116140/2021	EPI_ISL_12204007
hCoV-19/USA/NE-CUMC_21116141/2021	EPI_ISL_12204008
hCoV-19/USA/NE-CUMC_21116142/2021	EPI_ISL_12204009
hCoV-19/USA/NE-CUMC_21116144/2021	EPI_ISL_12204010
hCoV-19/USA/NE-CUMC_21116145/2021	EPI_ISL_12204011
hCoV-19/USA/NE-CUMC_21116146/2021	EPI_ISL_12204012
hCoV-19/USA/NE-CUMC_21116147/2021	EPI_ISL_12204013
hCoV-19/USA/NE-CUMC_21116148/2021	EPI_ISL_12204014
hCoV-19/USA/NE-CUMC_21116149/2021	EPI_ISL_12204015
hCoV-19/USA/NE-CUMC_21116150/2021	EPI_ISL_12204016
hCoV-19/USA/NE-CUMC_21116151/2021	EPI_ISL_12204017
hCoV-19/USA/NE-CUMC_21116152/2021	EPI_ISL_12204018
hCoV-19/USA/NE-CUMC_21116153/2021	EPI_ISL_12204019
hCoV-19/USA/NE-CUMC_21116154/2021	EPI_ISL_12204020
hCoV-19/USA/NE-CUMC_21116155/2021	EPI_ISL_12204021
hCoV-19/USA/NE-CUMC_21116156/2021	EPI_ISL_12204022
hCoV-19/USA/NE-CUMC_21116157/2021	EPI_ISL_12204023
hCoV-19/USA/NE-CUMC_21116158/2021	EPI_ISL_12204024
hCoV-19/USA/NE-CUMC_21116159/2021	EPI_ISL_12204025
hCoV-19/USA/NE-CUMC_21116160/2021	EPI_ISL_12204026
hCoV-19/USA/NE-CUMC_21116161/2021	EPI_ISL_12204027
hCoV-19/USA/NE-CUMC_21116162/2021	EPI_ISL_12204028
hCoV-19/USA/NE-CUMC_21116164/2021	EPI_ISL_12204029
hCoV-19/USA/NE-CUMC_21116165/2021	EPI_ISL_12204030
hCoV-19/USA/NE-CUMC_21116166/2021	EPI_ISL_12204031
hCoV-19/USA/NE-CUMC_21116167/2021	EPI_ISL_12204032
hCoV-19/USA/NE-CUMC_21116168/2021	EPI_ISL_12204033
hCoV-19/USA/NE-CUMC_21116169/2021	EPI_ISL_12204034
hCoV-19/USA/NE-CUMC_21116170/2021	EPI_ISL_12204035
hCoV-19/USA/NE-CUMC_21116171/2021	EPI_ISL_12204036
hCoV-19/USA/NE-CUMC_21116172/2021	EPI_ISL_12204037
hCoV-19/USA/NE-CUMC_21116173/2021	EPI_ISL_12204038
hCoV-19/USA/NE-CUMC_21116174/2021	EPI_ISL_12204039
hCoV-19/USA/NE-CUMC_21116175/2021	EPI_ISL_12204040
hCoV-19/USA/NE-CUMC_21116176/2021	EPI_ISL_12204041
hCoV-19/USA/NE-CUMC_21116178/2021	EPI_ISL_12204042
hCoV-19/USA/NE-CUMC_21116179/2021	EPI_ISL_12204043
hCoV-19/USA/NE-CUMC_21116180/2021	EPI_ISL_12204044
hCoV-19/USA/NE-CUMC_21116184/2021	EPI_ISL_12204045
hCoV-19/USA/NE-CUMC_21116185/2021	EPI_ISL_12204046
hCoV-19/USA/NE-CUMC_21116186/2021	EPI_ISL_12204047
hCoV-19/USA/NE-CUMC_21116187/2021	EPI_ISL_12204048
hCoV-19/USA/NE-CUMC_21116188/2021	EPI_ISL_12204049
hCoV-19/USA/NE-CUMC_21116189/2021	EPI_ISL_12204050
hCoV-19/USA/NE-CUMC_21116190/2021	EPI_ISL_12204051
